# Supplementary material for: Automatic CAD Floor Plan Creation with Classification Algorithms
Source: Research Square preprint supplement (doi:10.21203/rs.3.rs-6435916/v1), 2025-05-06
Supplement: Supplementary file 1 [file a6569c46f678997375c86ba8.pdf]

## Author Biographies

**Alperen Kayan** is a senior Software Engineering student at Istanbul Beykent University. Passionate about both computer hardware and software from a young age, he has consistently sought self-development through hands-on projects and academic research. His primary interests lie in software development, system architecture, and emerging technologies.

**Muhammet Fatih Zengin** is currently pursuing a degree in Software Engineering at Istanbul Beykent University. His research interests include artificial intelligence, software technologies, and automotive systems. He has contributed to multiple software development projects and maintains an active GitHub profile at [github.com/zenginzngn](https://github.com/zenginzngn), showcasing his dedication to open-source collaboration.

**Çağdaş Çakır** is an undergraduate Software Engineering student at Istanbul Beykent University, with a focus on mobile application development and responsive web design. Committed to modern software practices, he prioritizes usability and performance, integrating UI/UX design principles into his projects.

**Muhammed Berkay Erol** is pursuing his undergraduate degree in Software Engineering at Istanbul Beykent University. His academic interests center on artificial intelligence, specifically in natural language processing, deep learning, and image processing. He has participated in several AI research projects, including work on automated floor plan generation.

**Zeyd Alcan** is a Software Engineering student at Istanbul Beykent University. A technology enthusiast, he actively participates in various software projects to deepen his expertise and expand his competencies in applied computing.

**Dr. Gülay Cicek** is an Associate Professor in the Department of Biomedical Engineering at Istanbul Beykent University. She holds a BSc in Computer Engineering (2012), an MSc (2014), and a PhD (2021) in Computer Engineering. She also earned a degree in Business Administration from Anadolu University in 2011. Her research focuses on artificial intelligence, including data mining, machine learning, deep learning, and image processing. She has supervised numerous projects in AI and software engineering and is actively engaged in interdisciplinary research and academic mentoring.
