# Supplementary material for: Automatic CAD Floor Plan Creation with Classification Algorithms
Source: Research Square preprint supplement (doi:10.21203/rs.3.rs-6435916/v1), 2025-05-06
Supplement: Supplementary file 2 [file ff256c7f5c9f6fa7e1ed8f83.pdf]

## Highlights

- A novel AI-based system is proposed for the automatic generation of architectural floor plans.
- The model integrates Convolutional Neural Networks (CNNs) and classification algorithms.
- A hybrid architecture combining deep learning and traditional machine learning is developed.
- The system is trained on a publicly available dataset of 15,000 floor plans across 28 categories.
- The proposed approach aims to accelerate and inspire the architectural design process.
- This work fills a gap in current research by focusing specifically on floor plan generation using AI.
